# Supplementary material for: Synthesis of Novel Bromophenol with Diaryl Methanes—Determination of Their Inhibition Effects on Carbonic Anhydrase and Acetylcholinesterase
Source: MDPI journal article supplement (doi:10.3390/molecules27217426), 2022-11-01

# Supplementary Material

## Synthesis of Diaryl Methanes Like Novel Bromophenol and Their inhibition effect on Carbonic Anhydrase and Acetylcholinesterase Enzyme Activity

Necla ÖZTAŞKIN<sup>a\*</sup>, Süleyman GÖKSU<sup>\*a</sup>, Yeliz DEMİR<sup>b</sup>,  
Ahmet MARAŞ<sup>a</sup>, İlhami GÜLÇİN<sup>a</sup>

<sup>a</sup>Department of Chemistry, Faculty of Science, Atatürk University, 25240-Erzurum-Turkey

<sup>b</sup>Department of Pharmacy Services, Göle Nihat Delibalta Vocational High School, Ardahan University, 75000-Ardahan, Turkey

### <sup>1</sup>H-NMR, <sup>13</sup>C-NMR and IR spectra

| Table of Contents                                                 | Page (NMR) | Page (IR) |
|-------------------------------------------------------------------|------------|-----------|
| 1-bromo-2-(2-bromo-4-methoxybenzyl)-4,5-dimethoxybenzene(13)      | S2         | S11       |
| 1-bromo-4,5-dimethoxy-2-(5-methoxy-2-methylbenzyl)benzene (14)    | S3         | S11       |
| 1-bromo-2-(4-bromo-2,5-dimethoxybenzyl)-4,5-dimethoxybenzene (15) | S4         | S12       |
| 1-bromo-2-(2,5-dimethoxybenzyl)-4,5-dimethoxybenzene (16)         | S5         | S12       |
| 1-bromo-2-(2,5-dimethoxybenzyl)-4,5-dimethoxybenzene (17)         | S6         | S13       |
| 4-bromo-5-(2-bromo-4-hydroxybenzyl)benzene-1,2-diol (18)          | S7         | S13       |
| 4-bromo-5-(2-bromo-4-hydroxybenzyl)benzene-1,2-diol (19)          | S8         | S14       |
| 4-bromo-5-(4-bromo-2,5-dihydroxybenzyl)benzene-1,2-diol (20)      | S9         | S14       |
| 4-bromo-5-(2,5-dihydroxybenzyl)benzene-1,2-diol (21)              | S10        | S15       |
|                                                                   |            |           |

**$^1\text{H}$ -NMR and  $^{13}\text{C}$ -NMR of compound 13( $\text{CDCl}_3$ )**

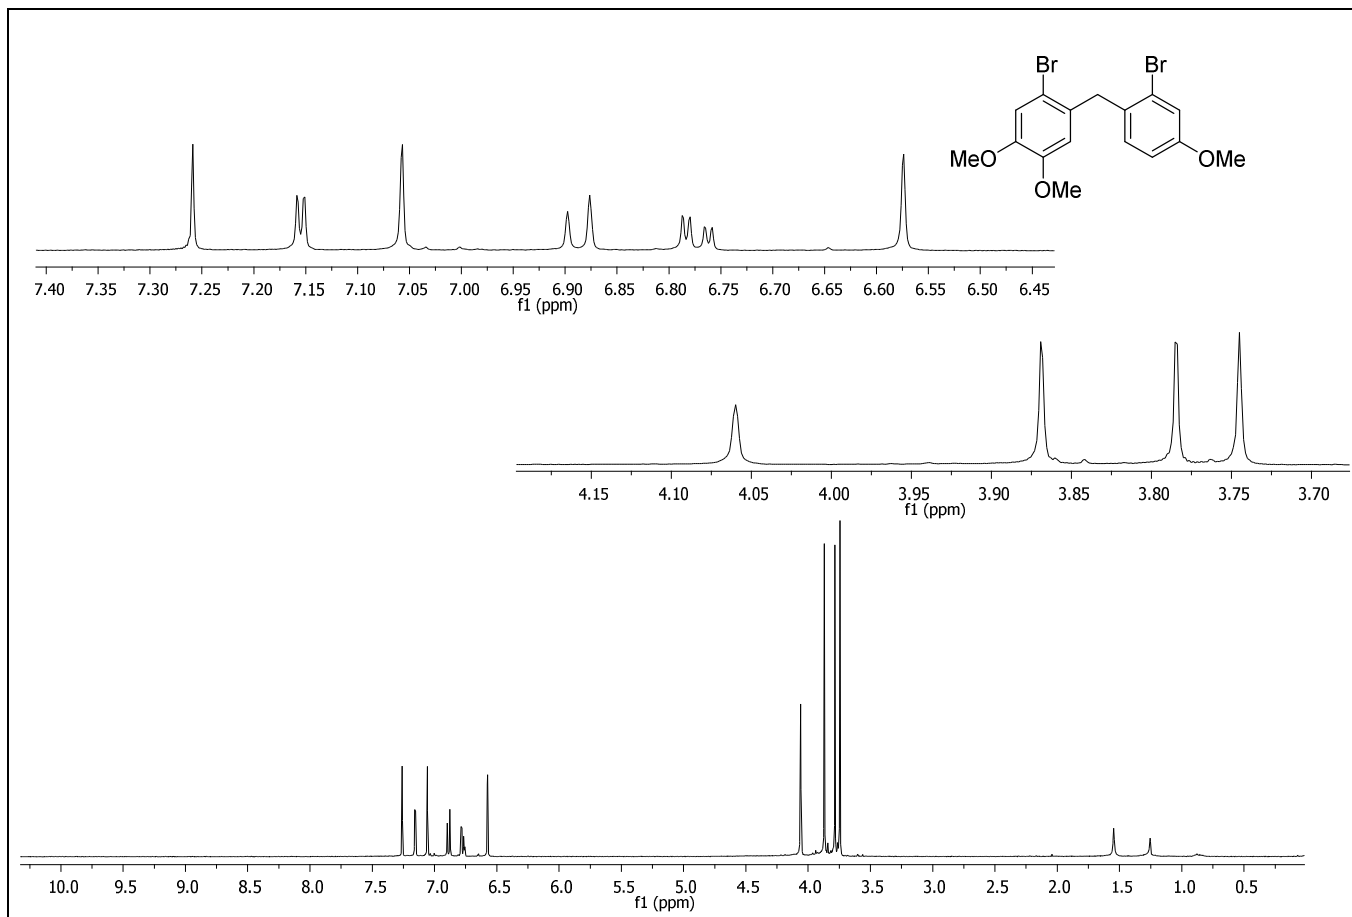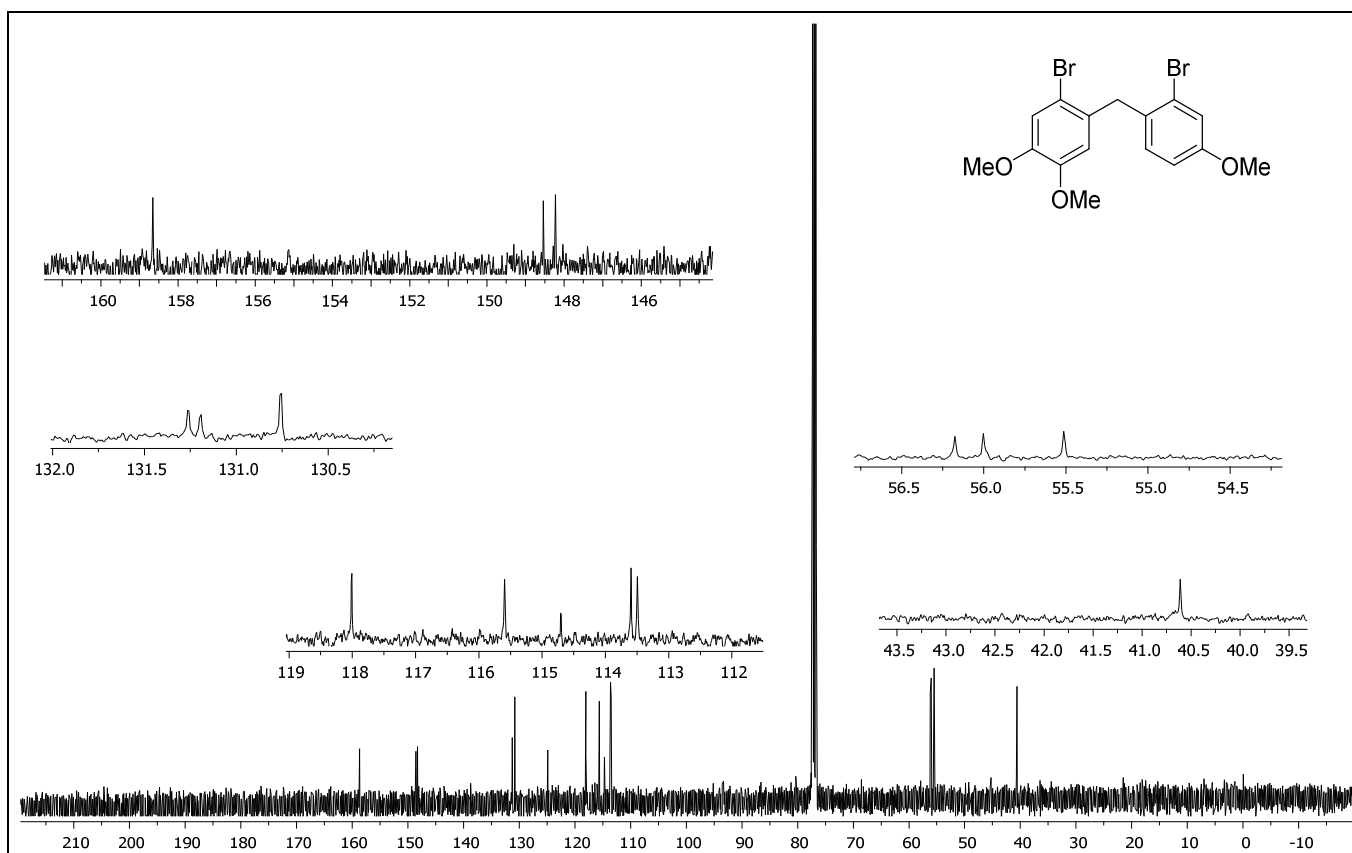

**$^1\text{H}$ -NMR and  $^{13}\text{C}$ -NMR of compound 14 ( $\text{CDCl}_3$ )**

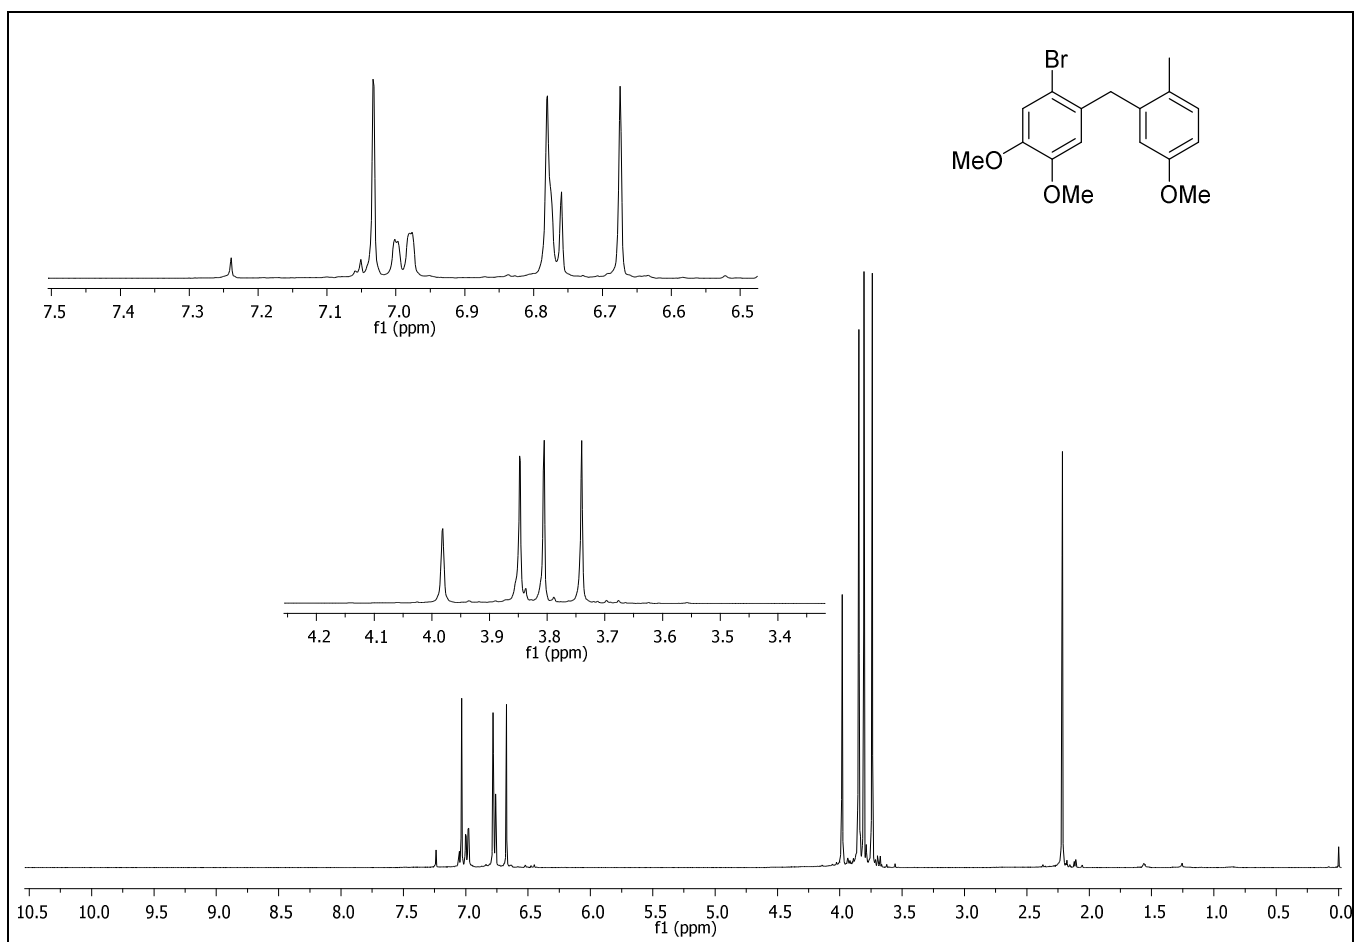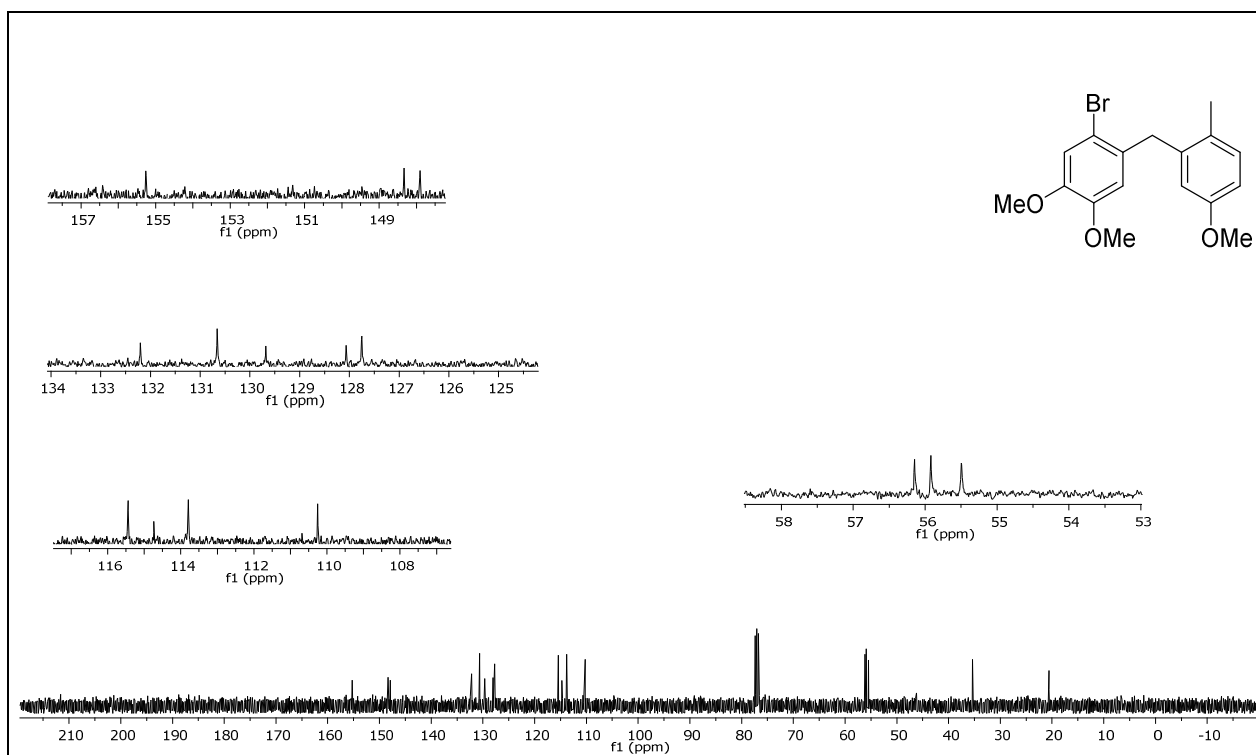

**$^1\text{H}$ -NMR and  $^{13}\text{C}$ -NMR of compound 15( $\text{CDCl}_3$ )**

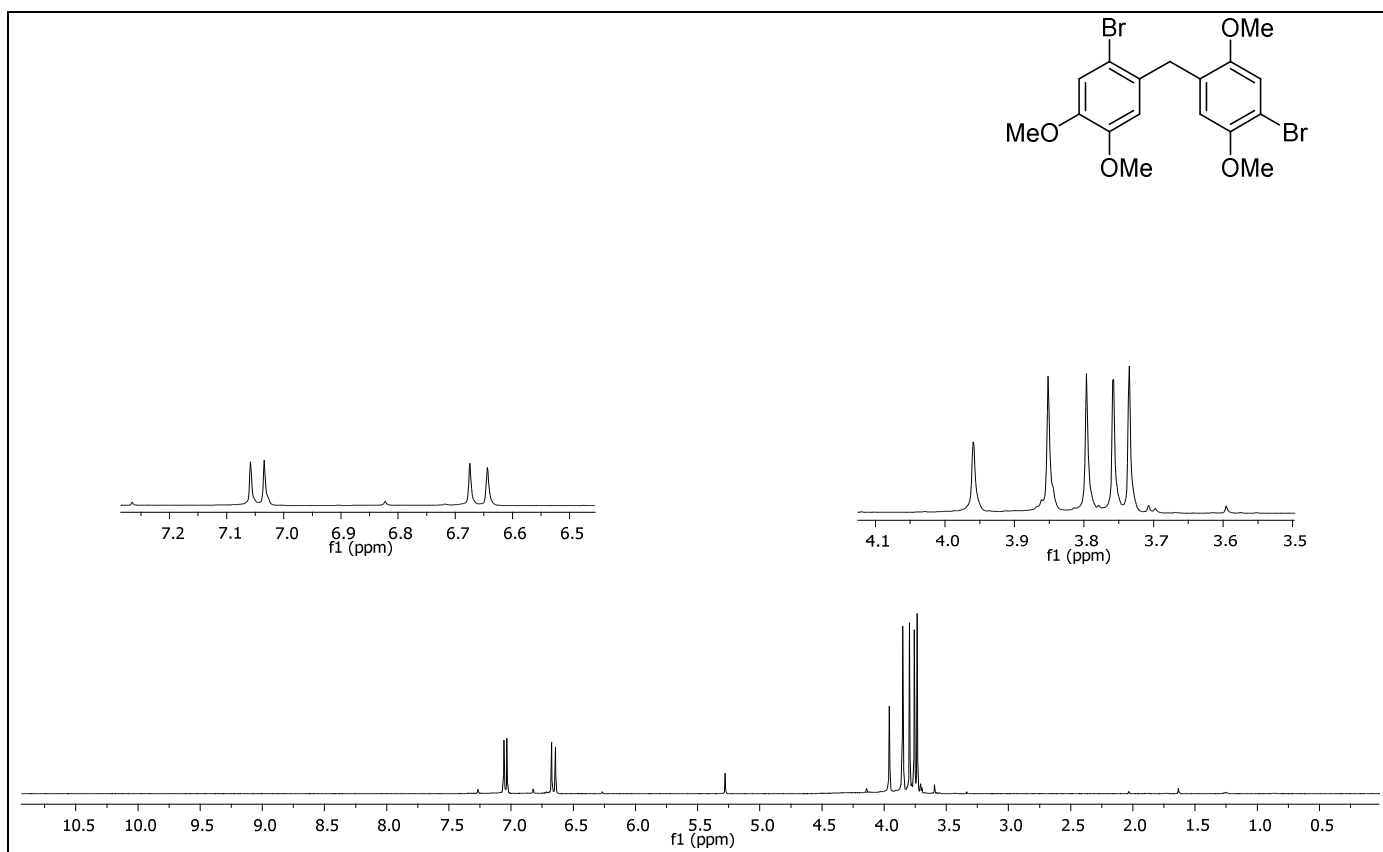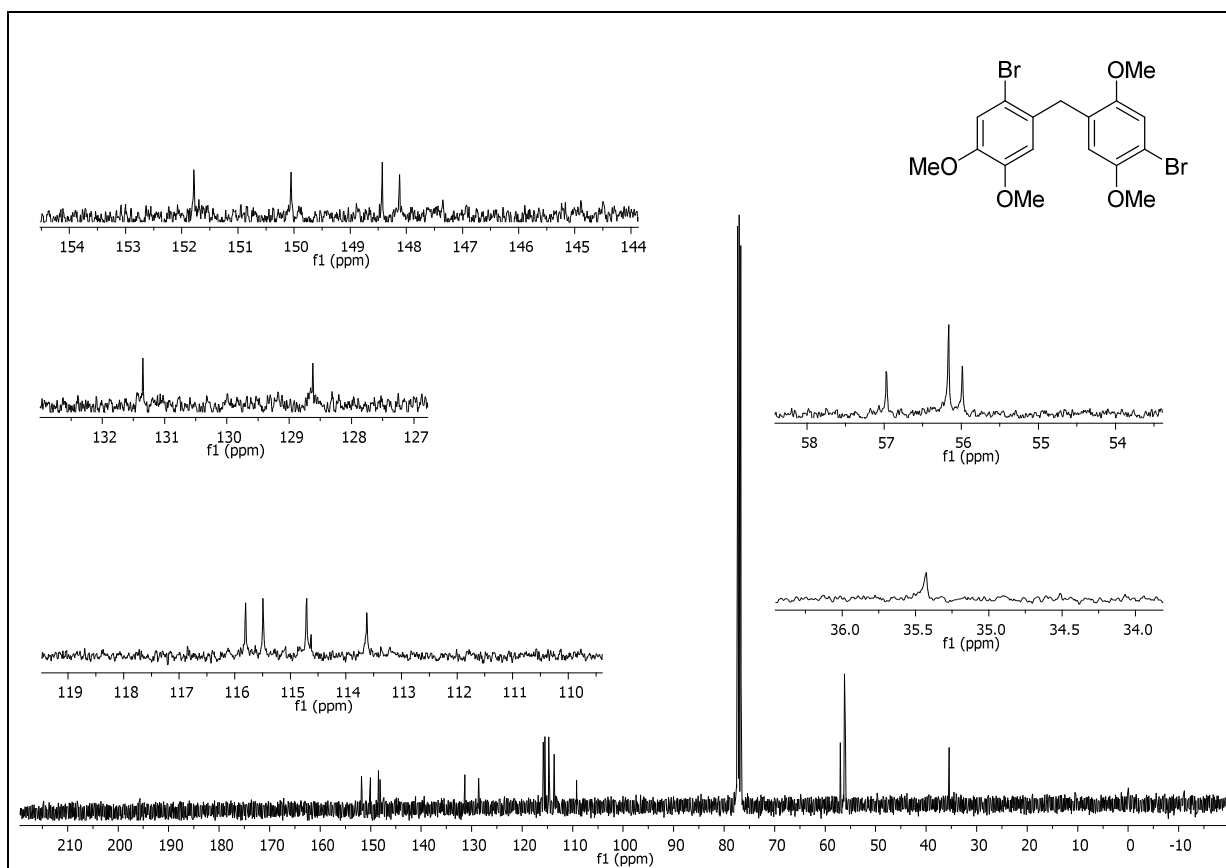

$^1\text{H}$ -NMR and  $^{13}\text{C}$ -NMR of compound 16 ( $\text{CDCl}_3$ )

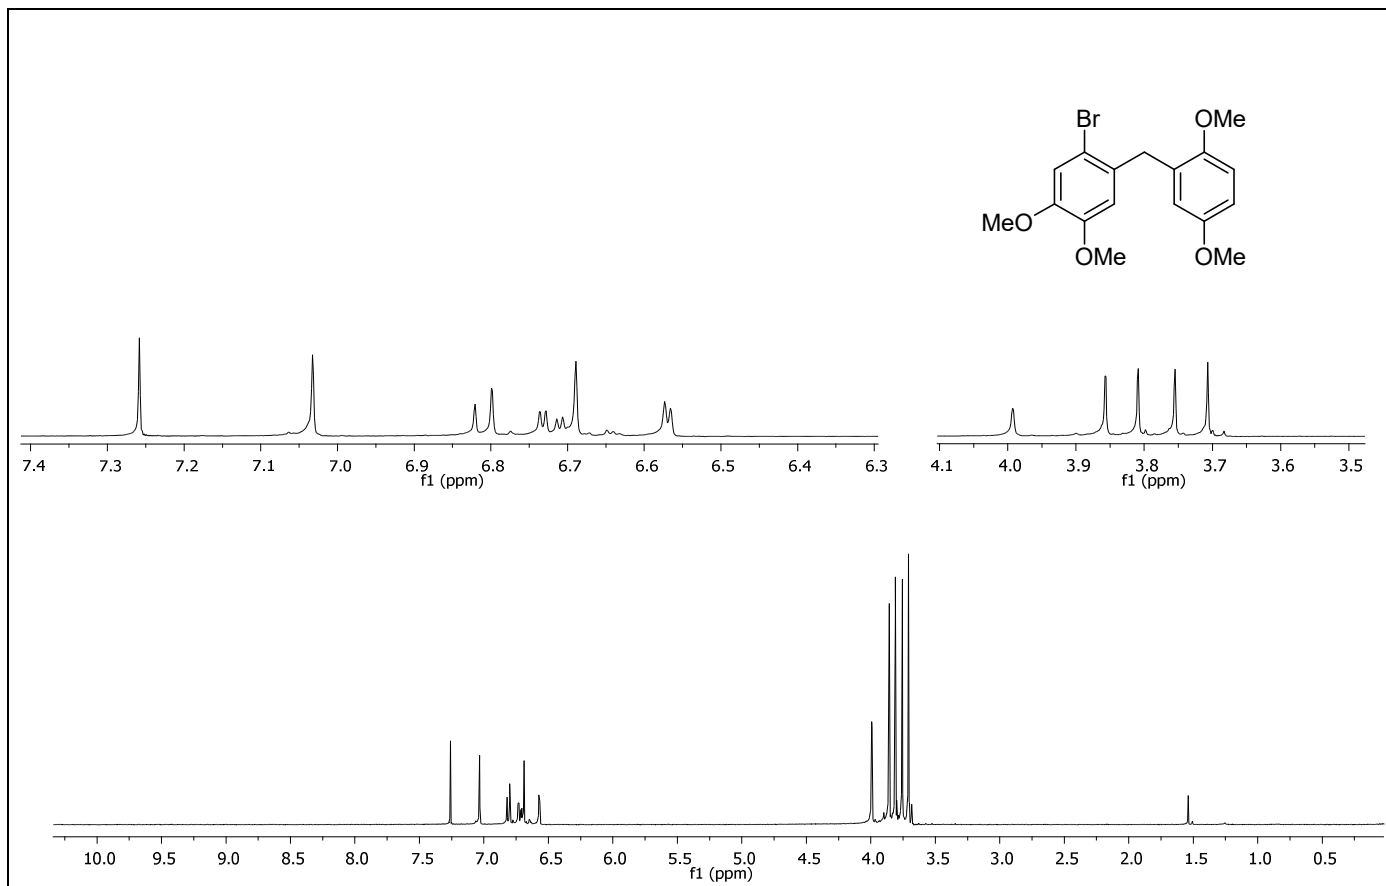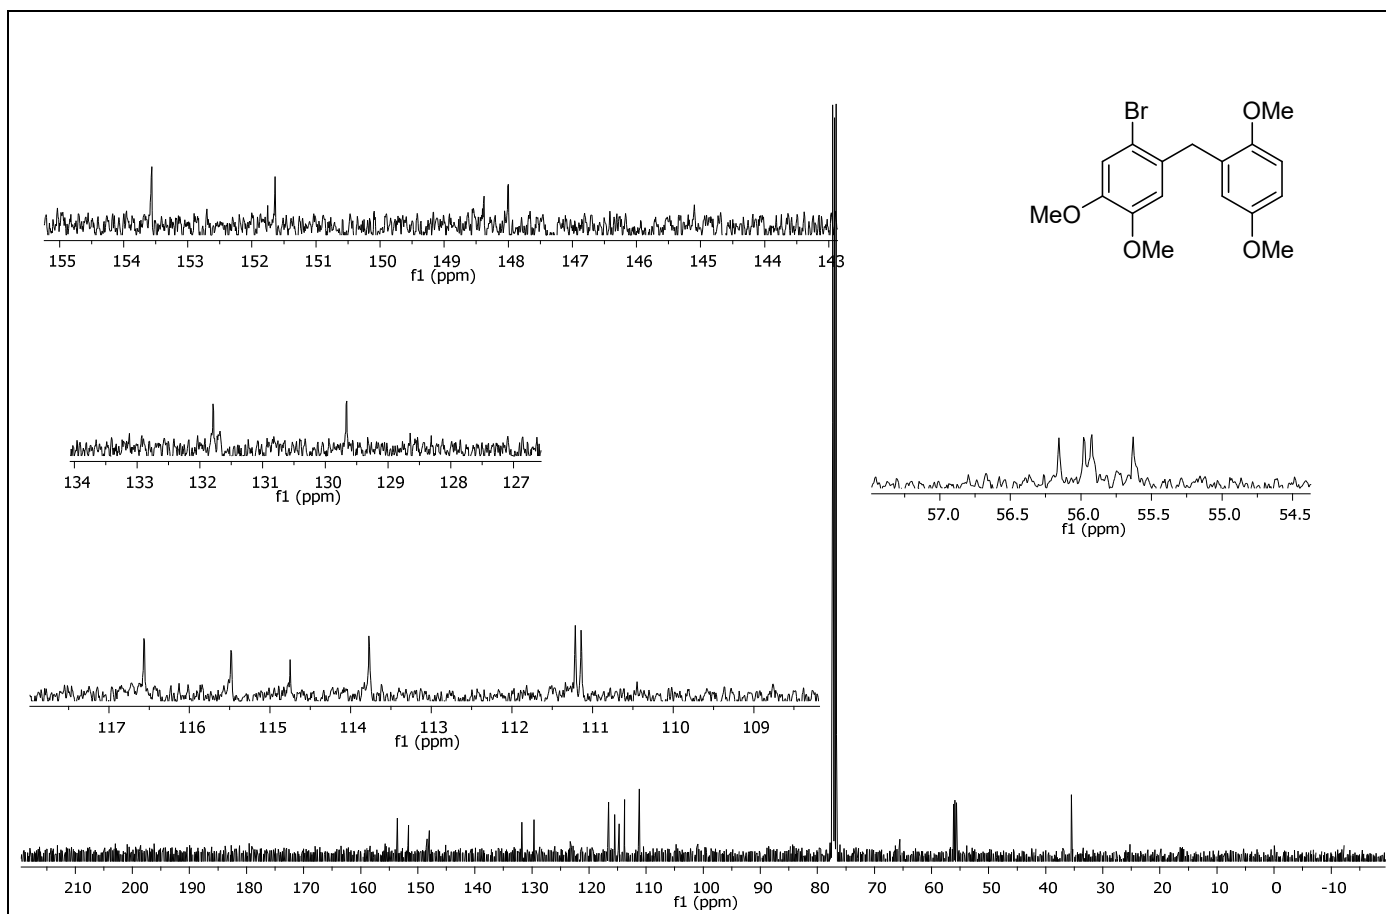

**$^1\text{H}$ -NMR and  $^{13}\text{C}$ -NMR of compound 17( $\text{CDCl}_3$ )**

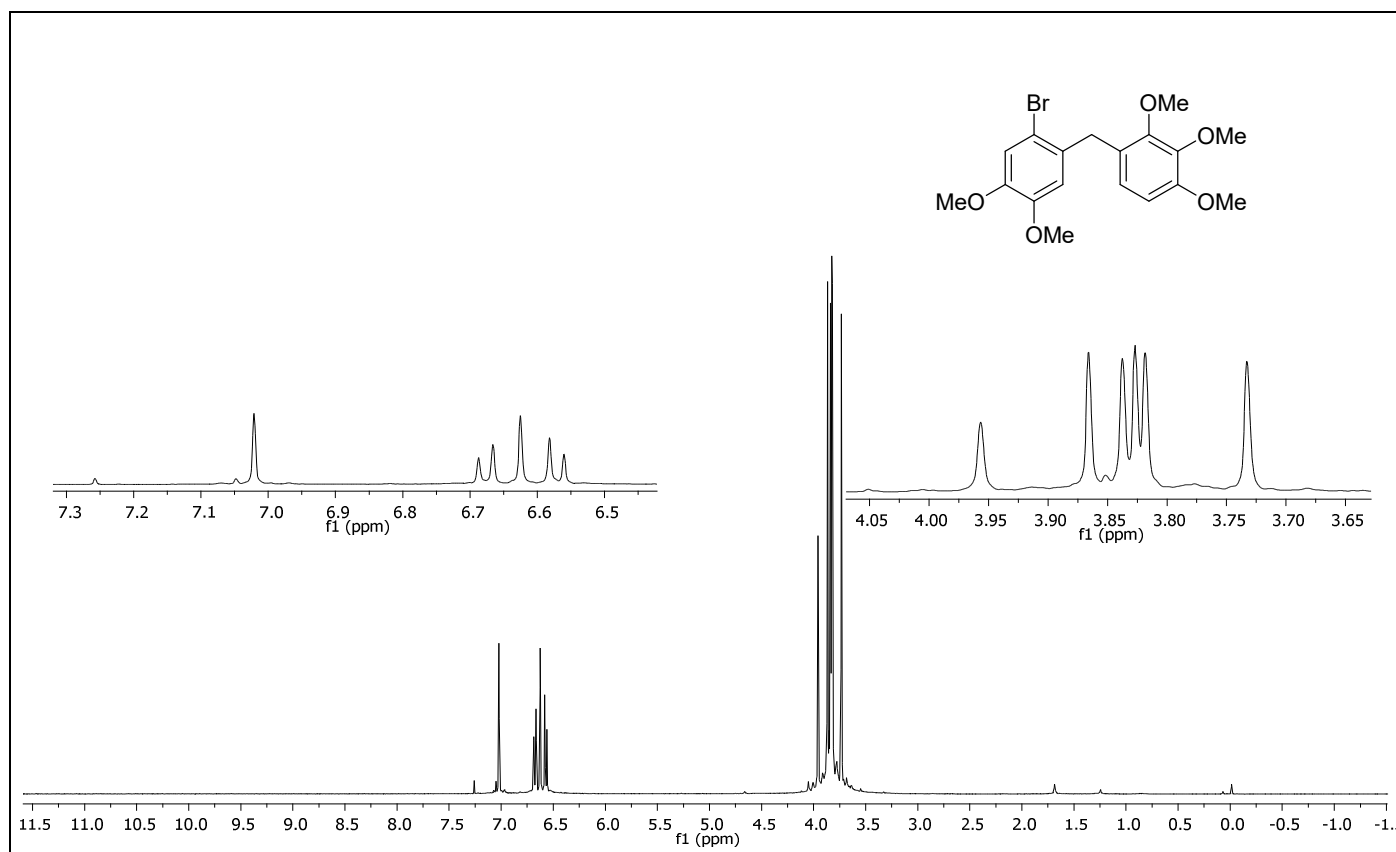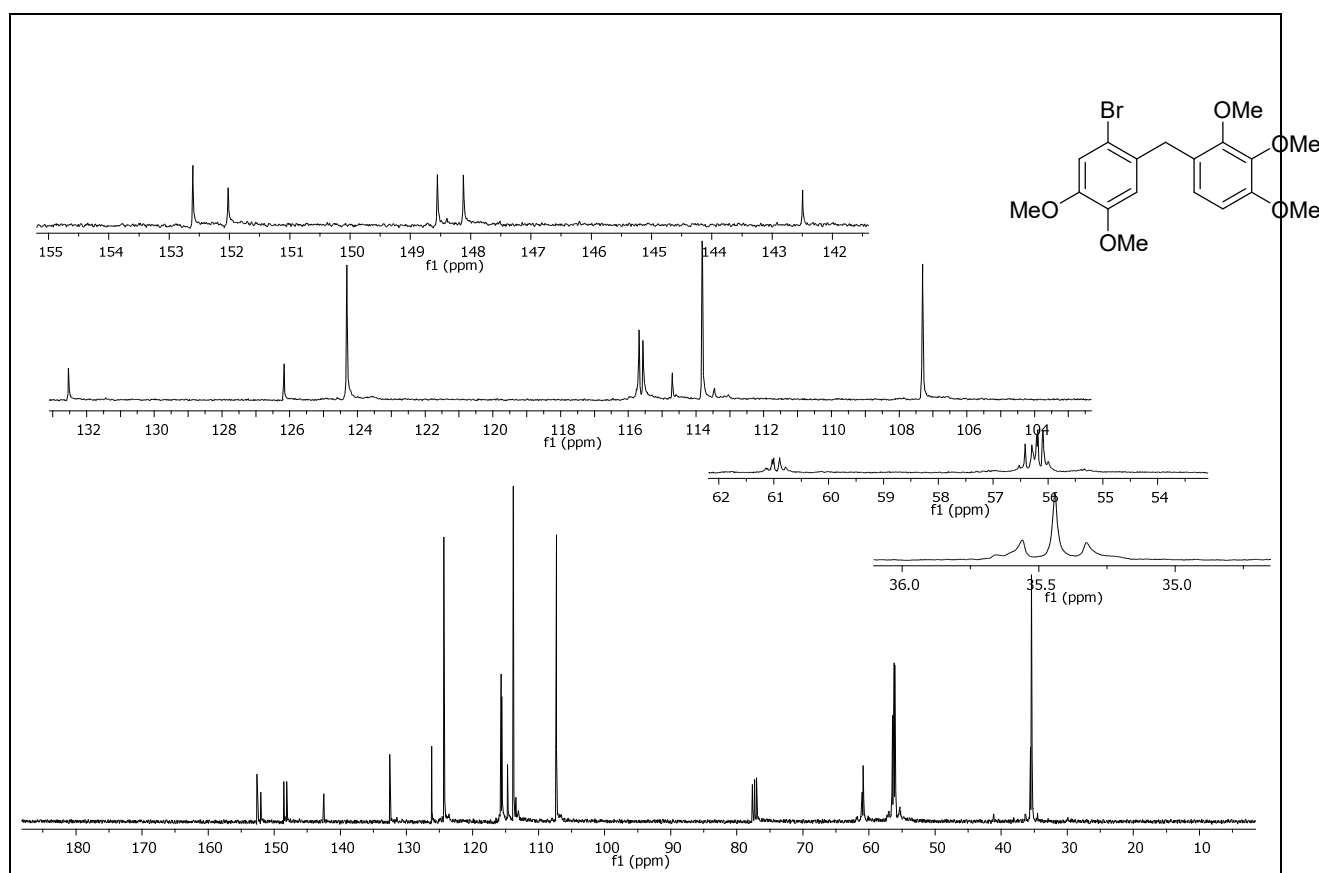

**$^1\text{H}$ -NMR and  $^{13}\text{C}$ -NMR of compound 18 ( $\text{CD}_3\text{COCD}_3$ )**

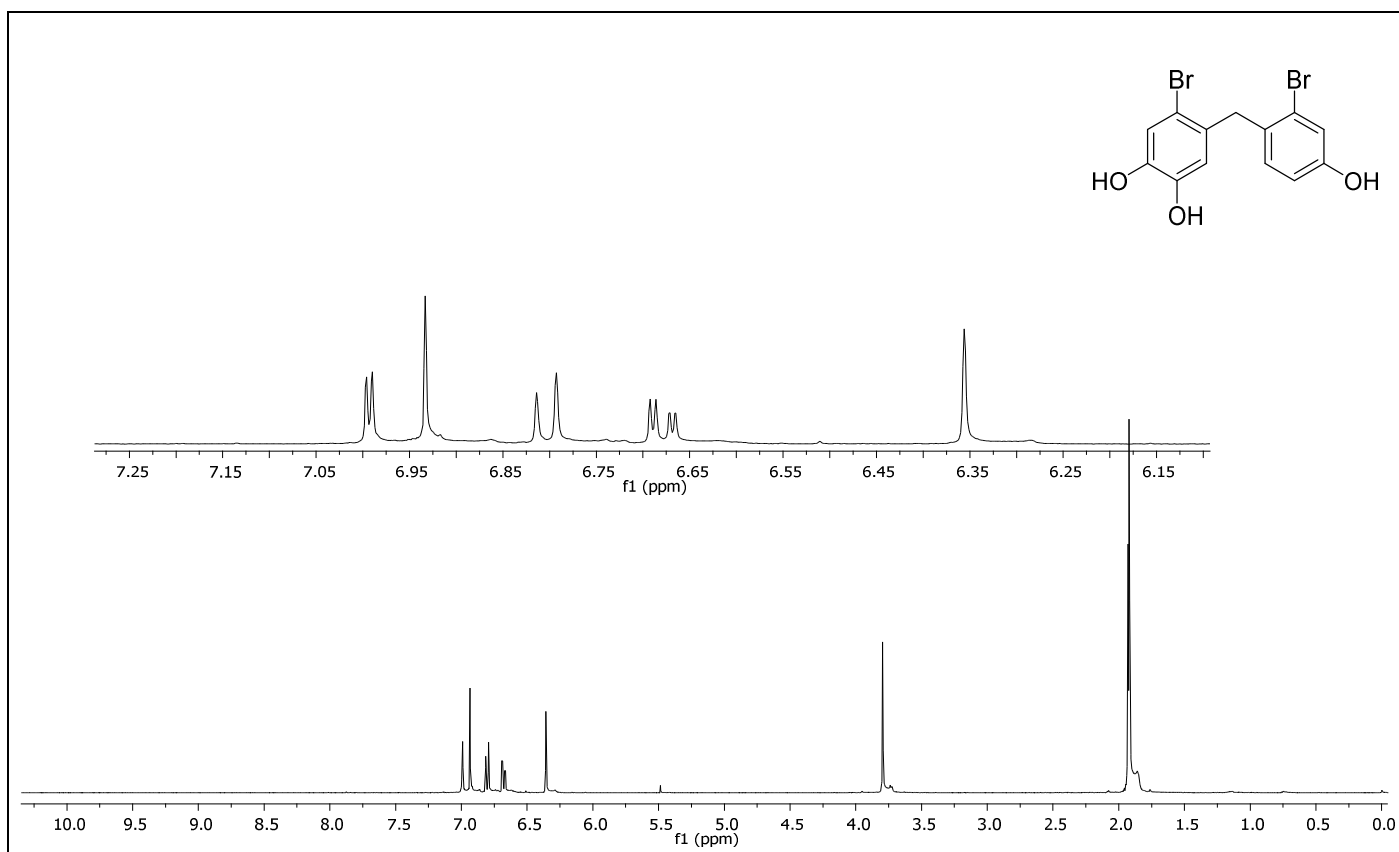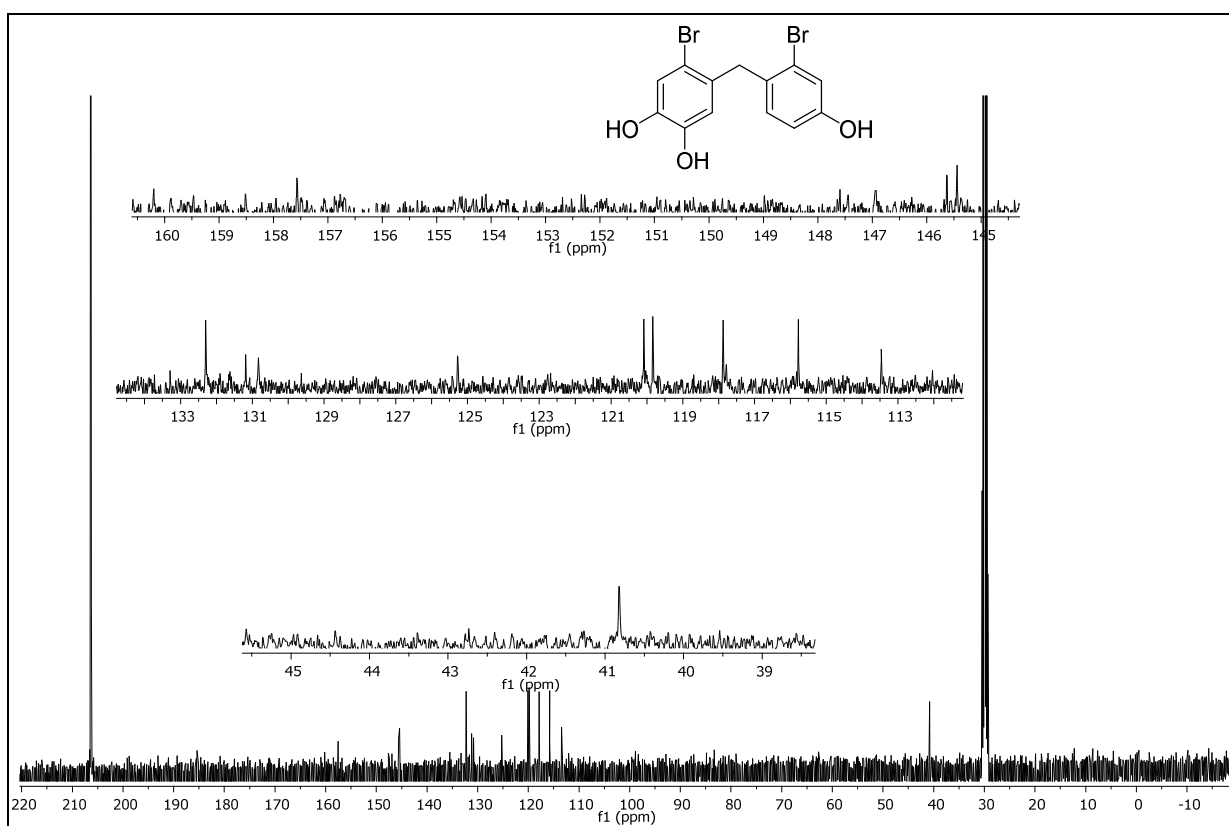

$^1\text{H}$ -NMR and  $^{13}\text{C}$ -NMR of compound 19 ( $\text{CD}_3\text{COCD}_3$ )

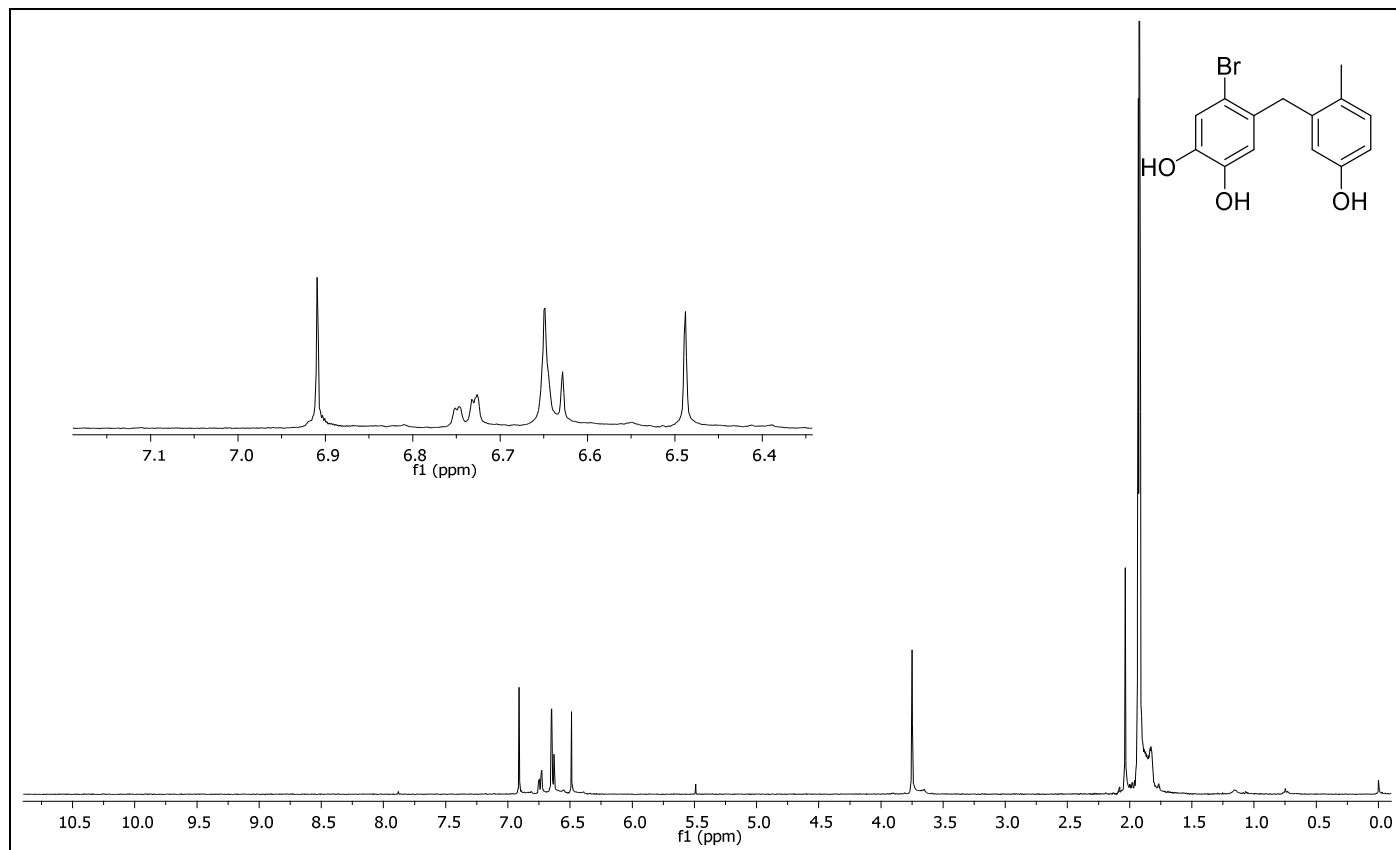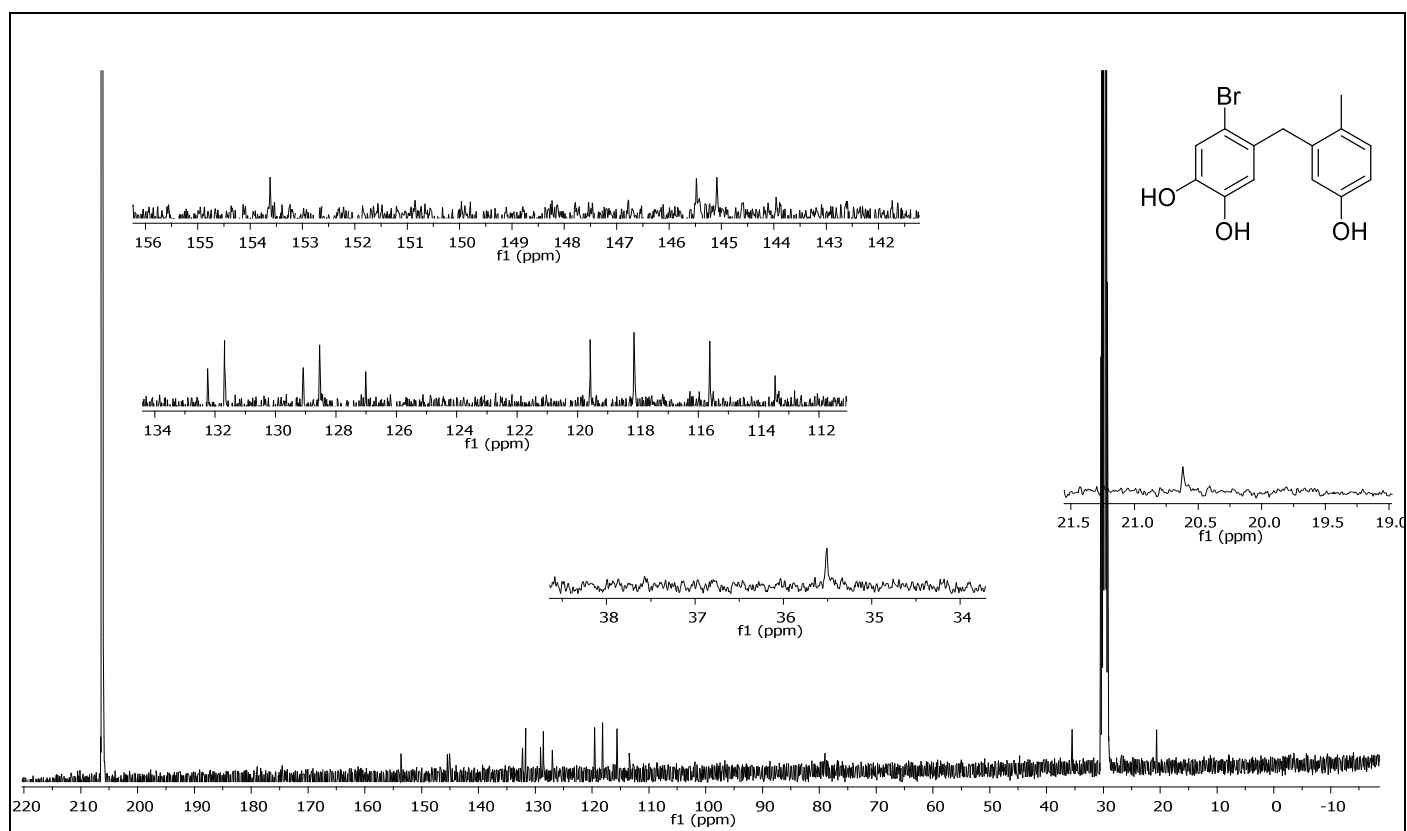

**$^1\text{H}$ -NMR and  $^{13}\text{C}$ -NMR of compound 20 ( $\text{CD}_3\text{COCD}_3$ )**

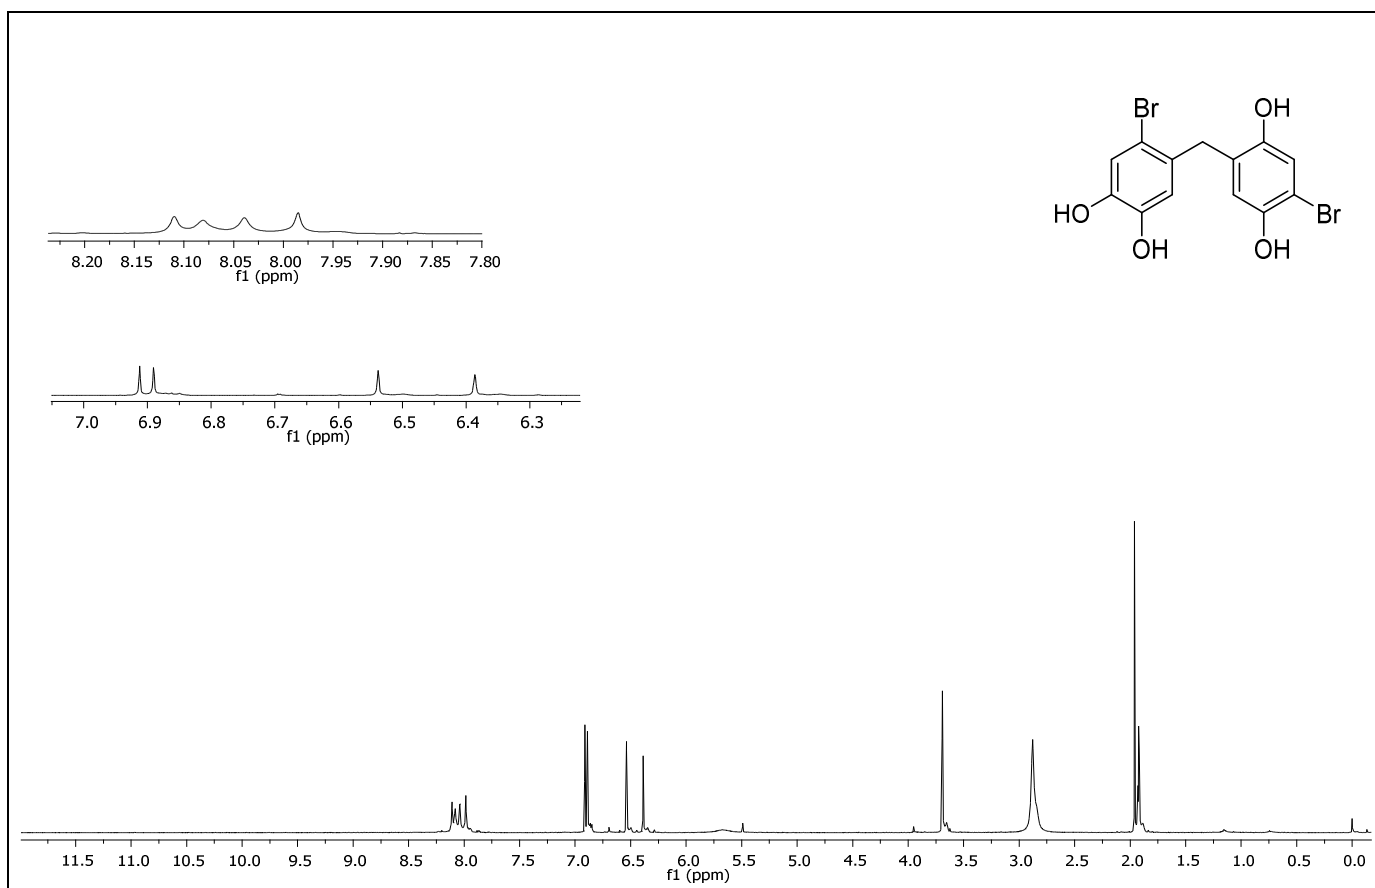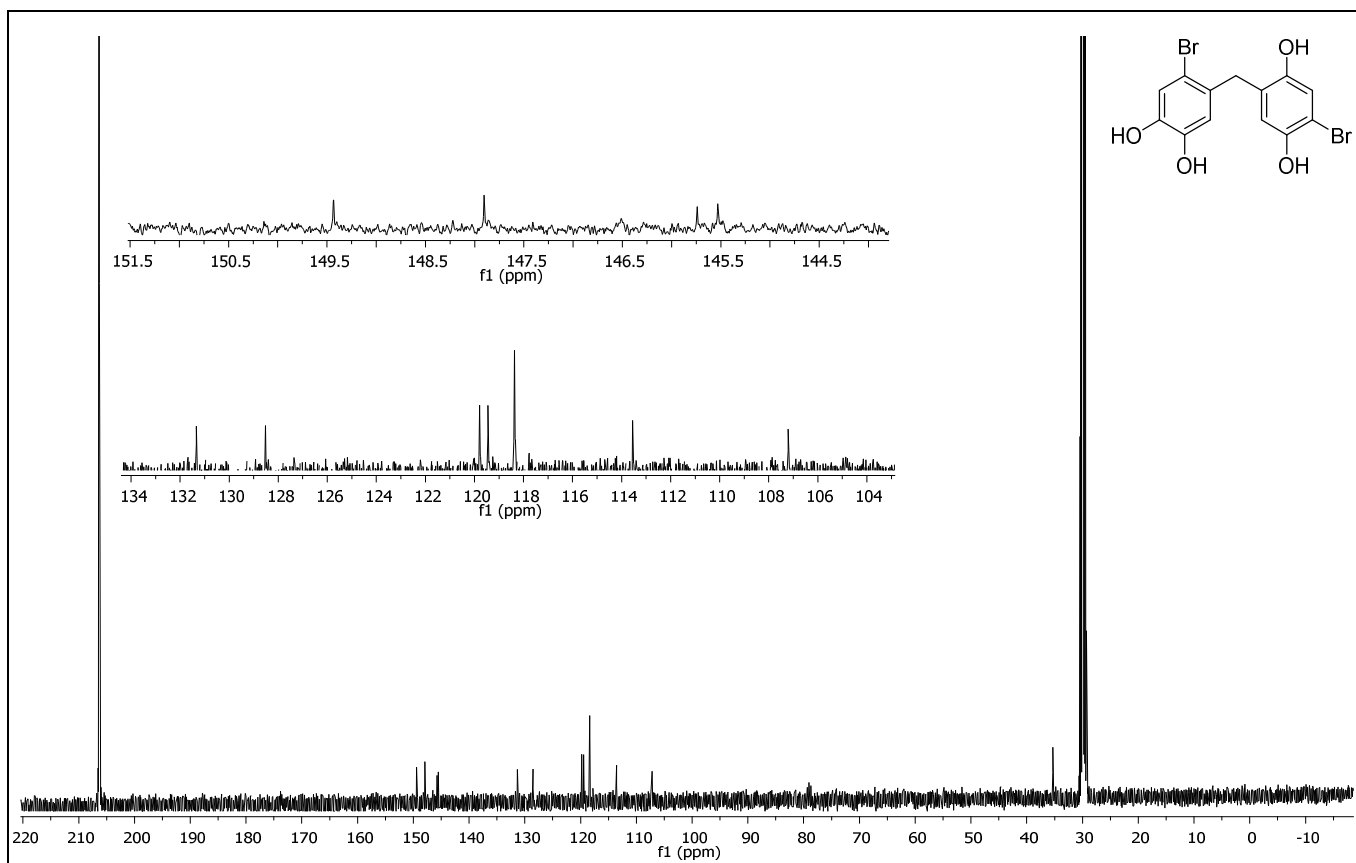

**$^1\text{H}$ -NMR and  $^{13}\text{C}$ -NMR of compound 21 ( $\text{CD}_3\text{COCD}_3$ )**

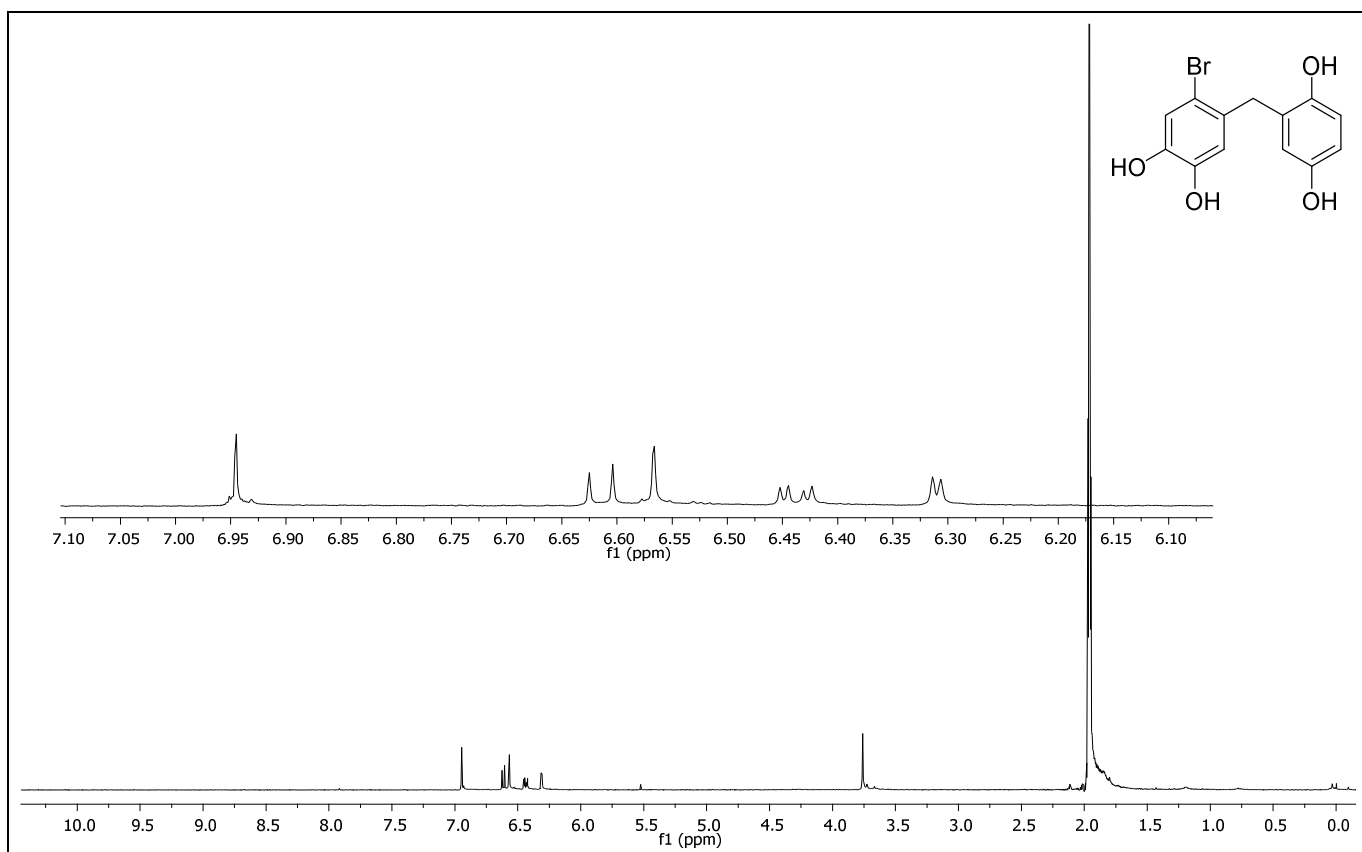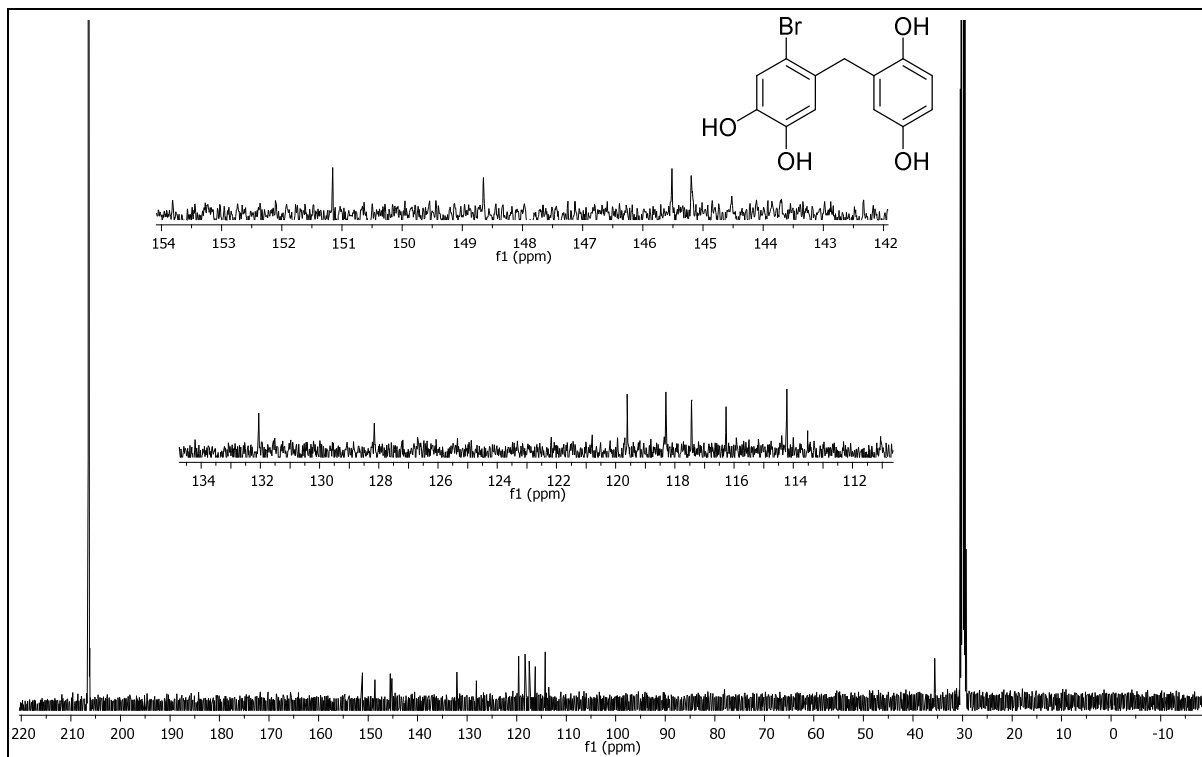

## IR spectra

### 1-bromo-2-(2-bromo-4-methoxybenzyl)-4,5-dimethoxybenzene(13)

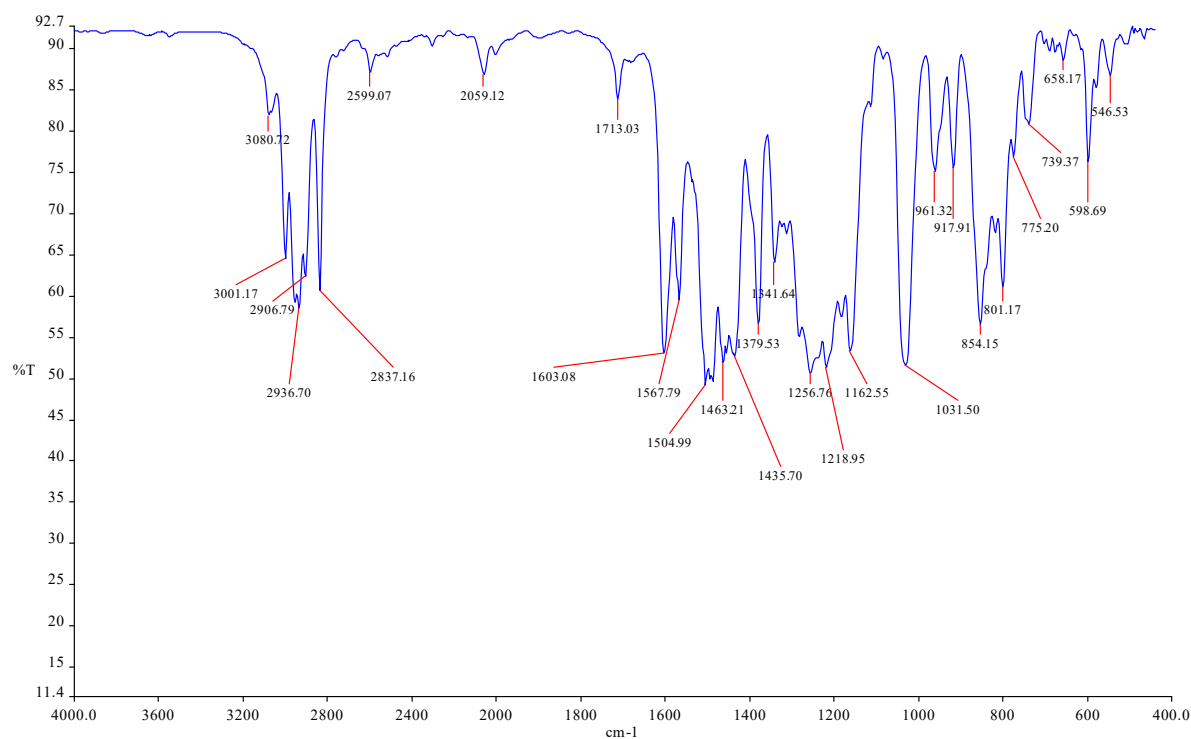

### 1-bromo-4,5-dimethoxy-2-(5-methoxy-2-methylbenzyl)benzene (14)

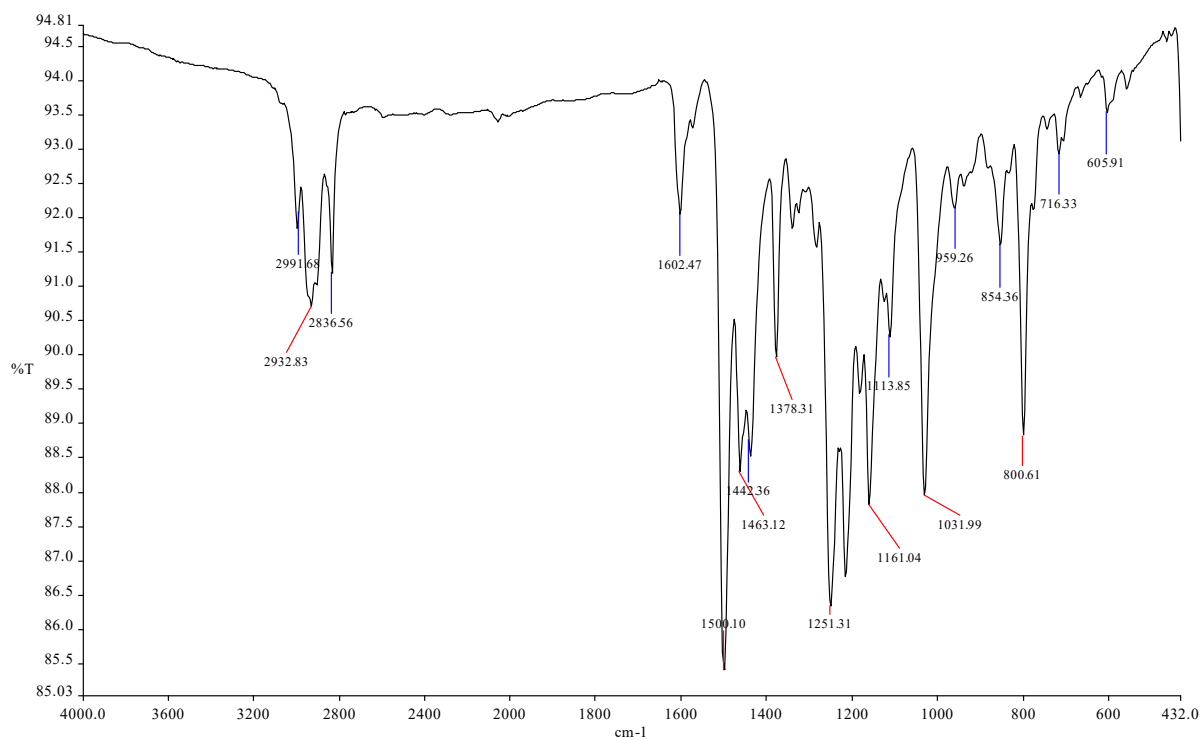

### 1-bromo-2-(4-bromo-2,5-dimethoxybenzyl)-4,5-dimethoxybenzene (15)

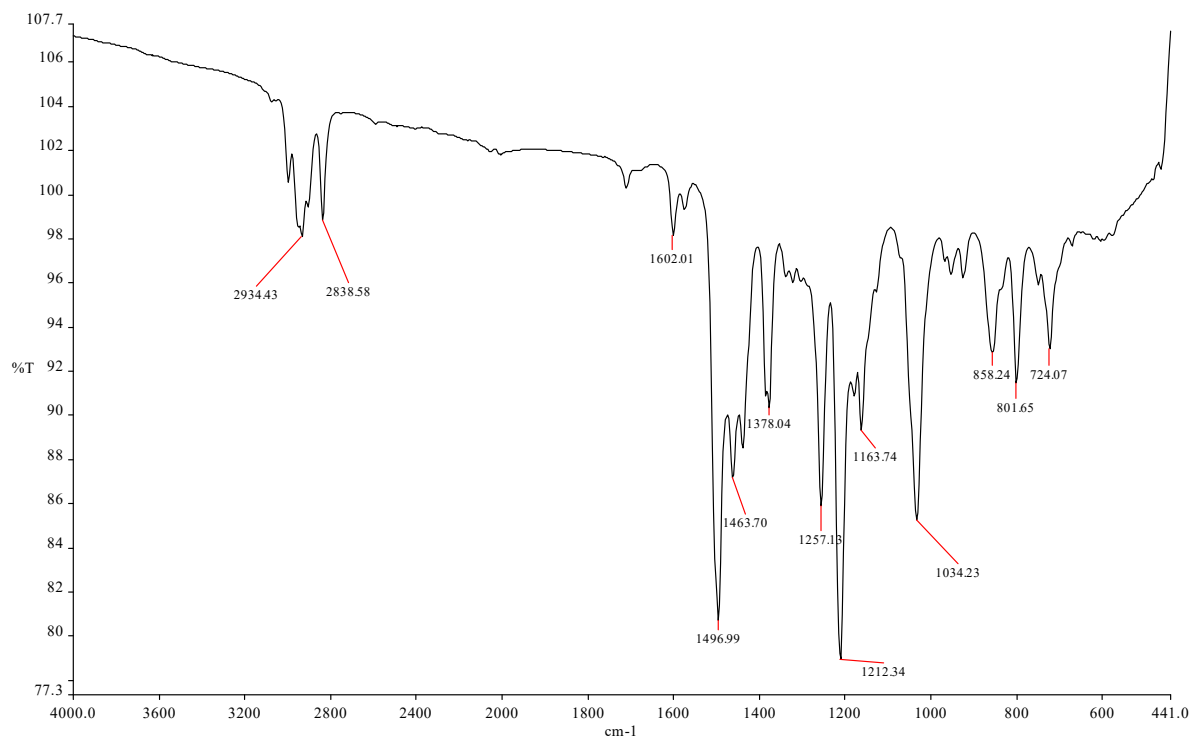

### 1-bromo-2-(2,5-dimethoxybenzyl)-4,5-dimethoxybenzene (16)

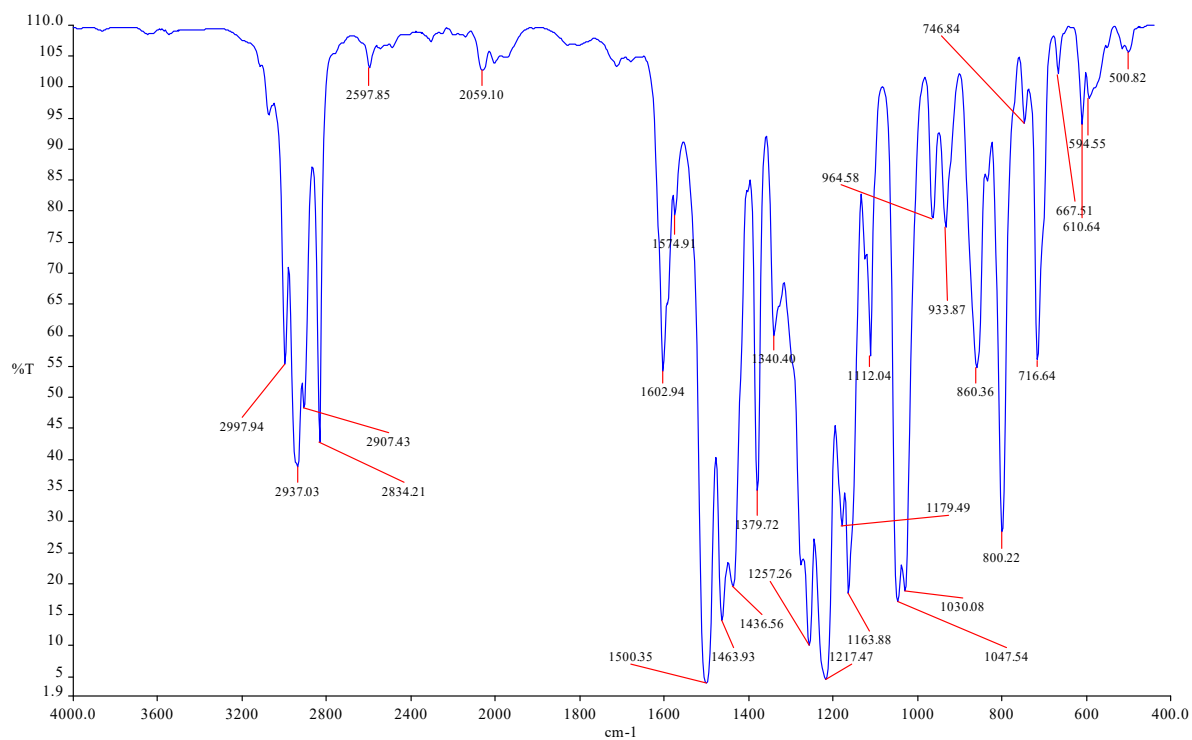

### 1-bromo-2-(2,5-dimethoxybenzyl)-4,5-dimethoxybenzene (17)

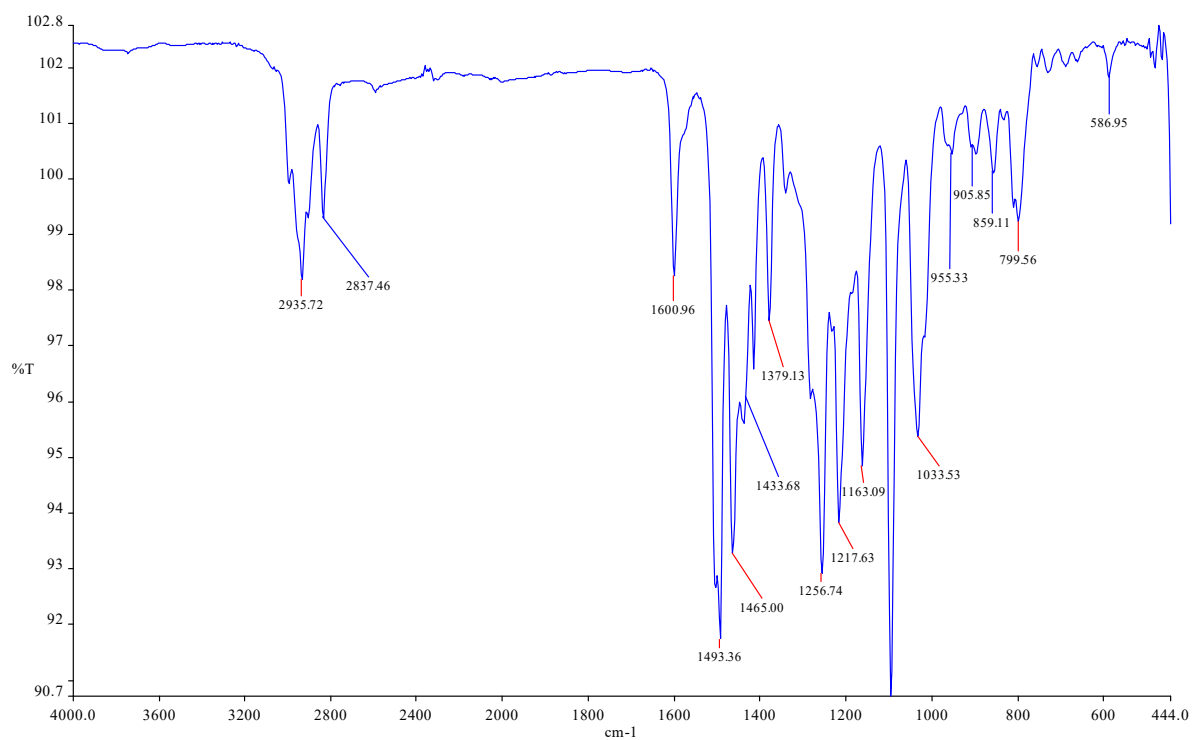

### 4-bromo-5-(2-bromo-4-hydroxybenzyl)benzene-1,2-diol (18)

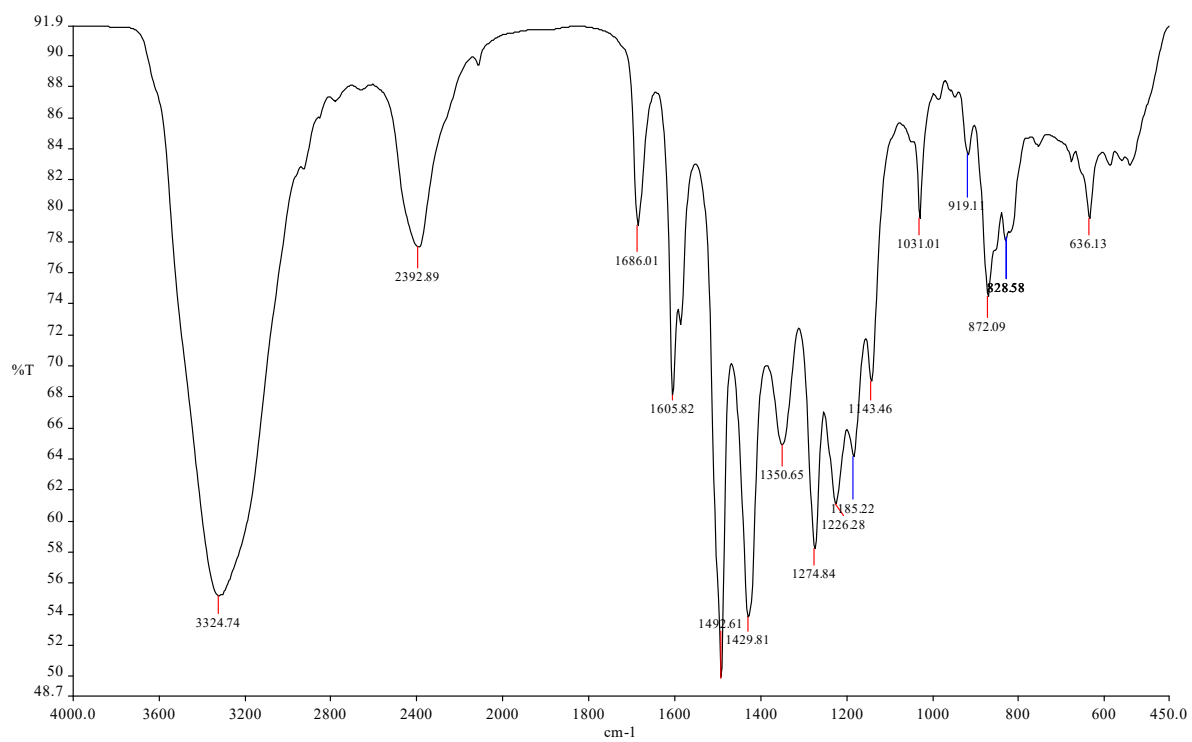

**4-bromo-5-(2-bromo-4-hydroxybenzyl)benzene-1,2-diol (19)**

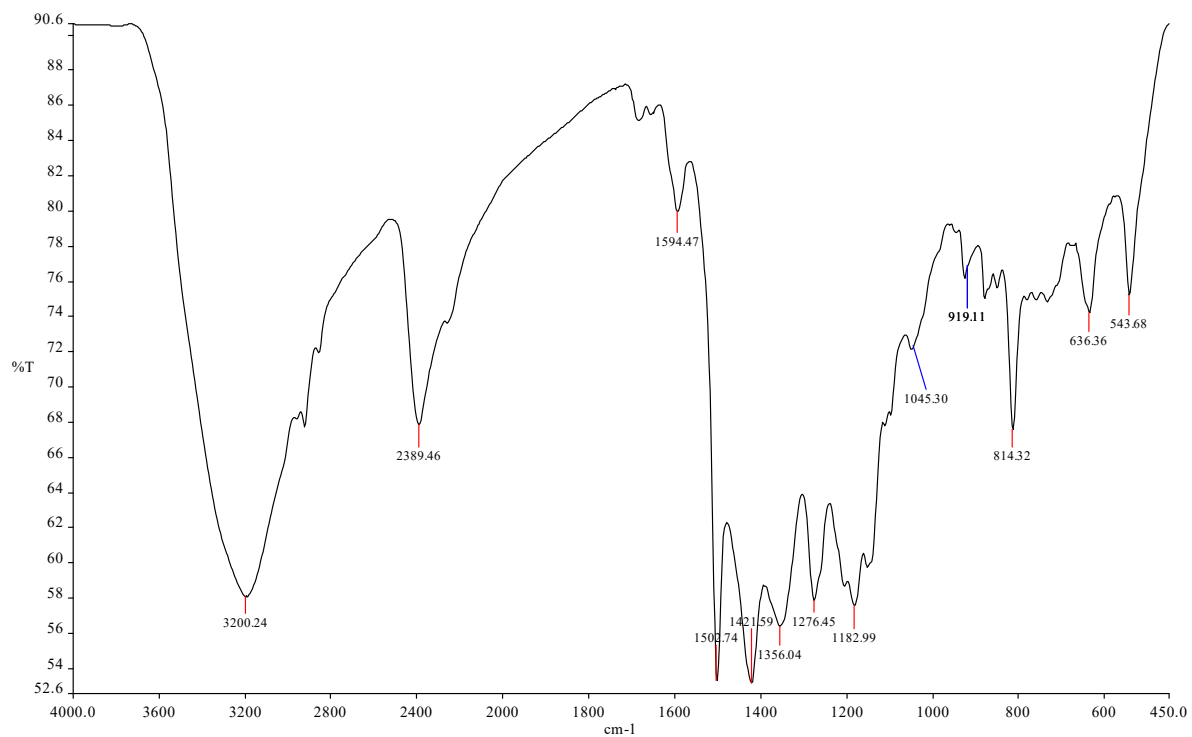

**4-bromo-5-(4-bromo-2,5-dihydroxybenzyl)benzene-1,2-diol (20)**

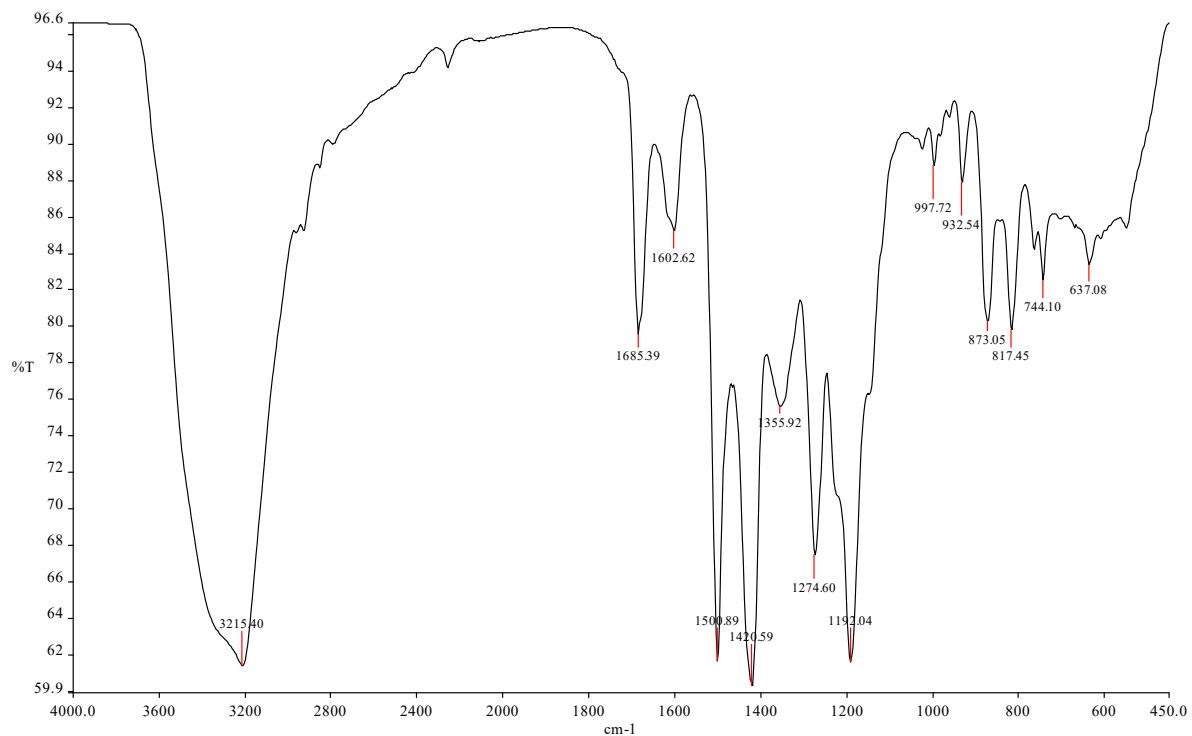

**4-bromo-5-(2,5-dihydroxybenzyl)benzene-1,2-diol (21)**

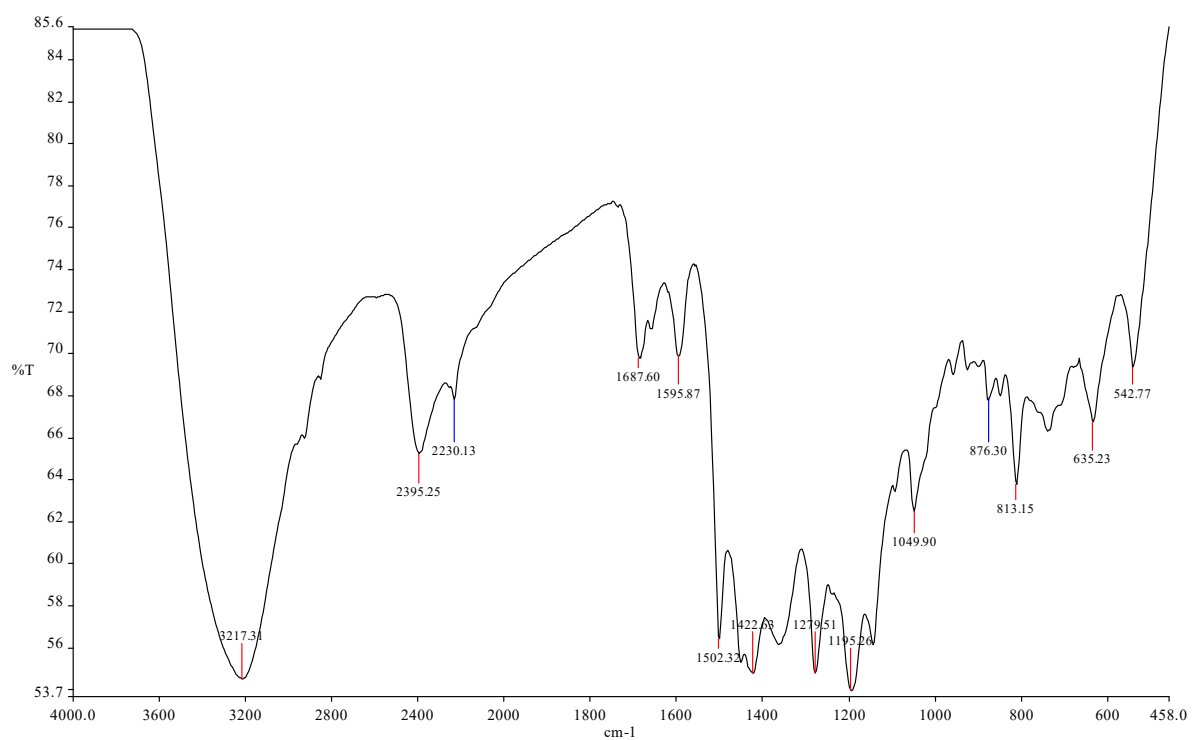

Supplement: s1 [file s1]
